# Supplementary material for: Effect of Graphene Oxide on the Properties of Poly(3-Hydroxybutyrate-co-3-Hydroxyhexanoate)
Source: MDPI journal article supplement (doi:10.3390/polym13142233), 2021-07-07
Supplement: s1 [file s1]

## Supplementary Materials

# Effect of Graphene Oxide on the Properties of Poly(3-hydroxybutyrate-*co*-3-hydroxyhexanoate)

Ana M. Díez-Pascual \*

Universidad de Alcalá, Facultad de Ciencias, Departamento de Química Analítica, Química Física e Ingeniería Química, Ctra. Madrid-Barcelona, Km. 33.6, 28805 Alcalá de Henares, Madrid, España (Spain);

\* Correspondence: am.diez@uah.es; Tel.: +34-918-856-430

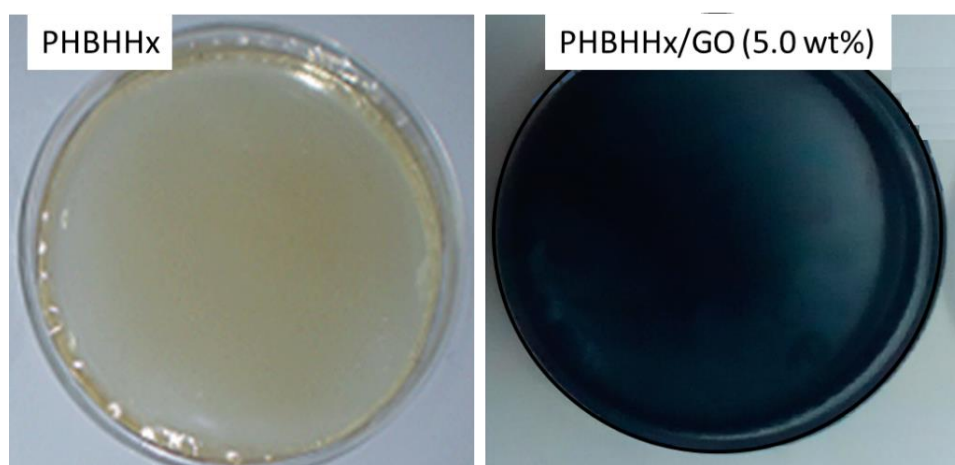

**Figure S1.** Photographs of neat PHBHHx and PHBHHx/GO (5.0 wt%).

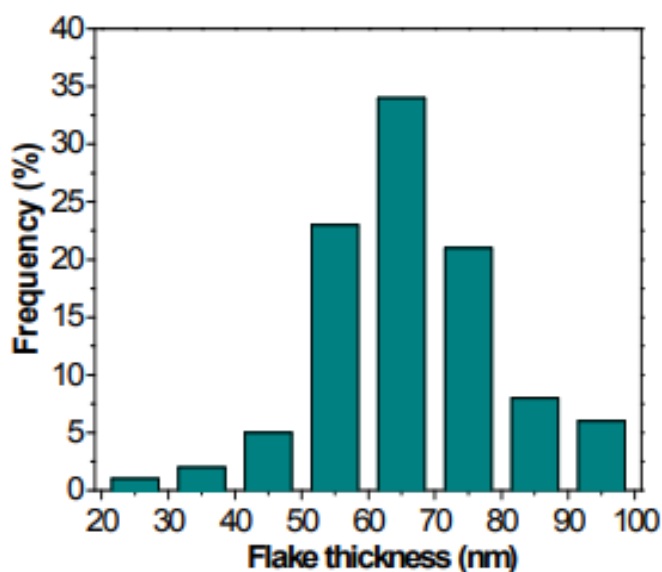

**Figure S2.** Histograms of the thickness distribution obtained from GO nanosheets.

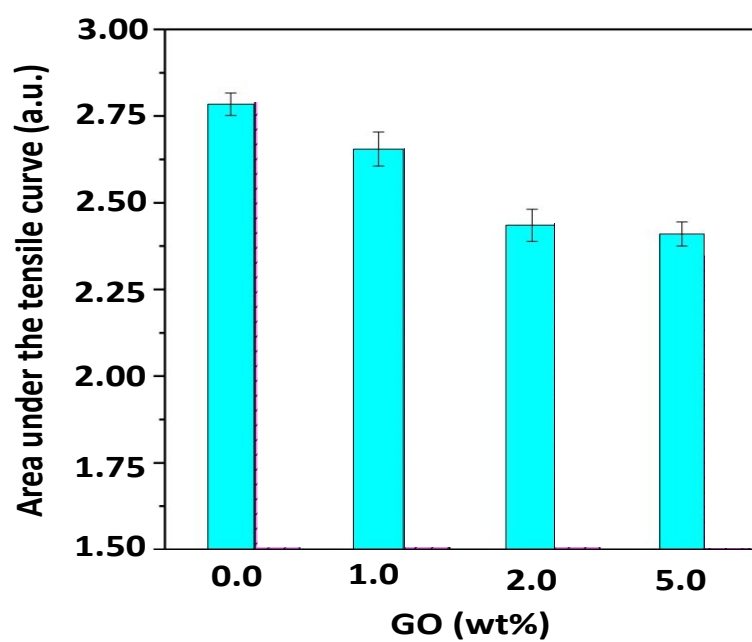

**Figure S3.** Area under the tensile curve as a function of GO loading.
